# Supplementary material for: Intrinsic disorder of the extracellular matrix
Source: Royal Society of Chemistry journal article supplement (doi:10.1039/c1mb05316g), 2011-10-19
Supplement: c1mb05316g.pdf [file c1mb05316g.pdf]

## INTRINSIC DISORDER OF THE EXTRACELLULAR MATRIX

Franck Peysselon<sup>1</sup>, Bin Xue<sup>2</sup>, Vladimir N. Uversky<sup>2,3\*</sup>, Sylvie Ricard-Blum<sup>1\*</sup>

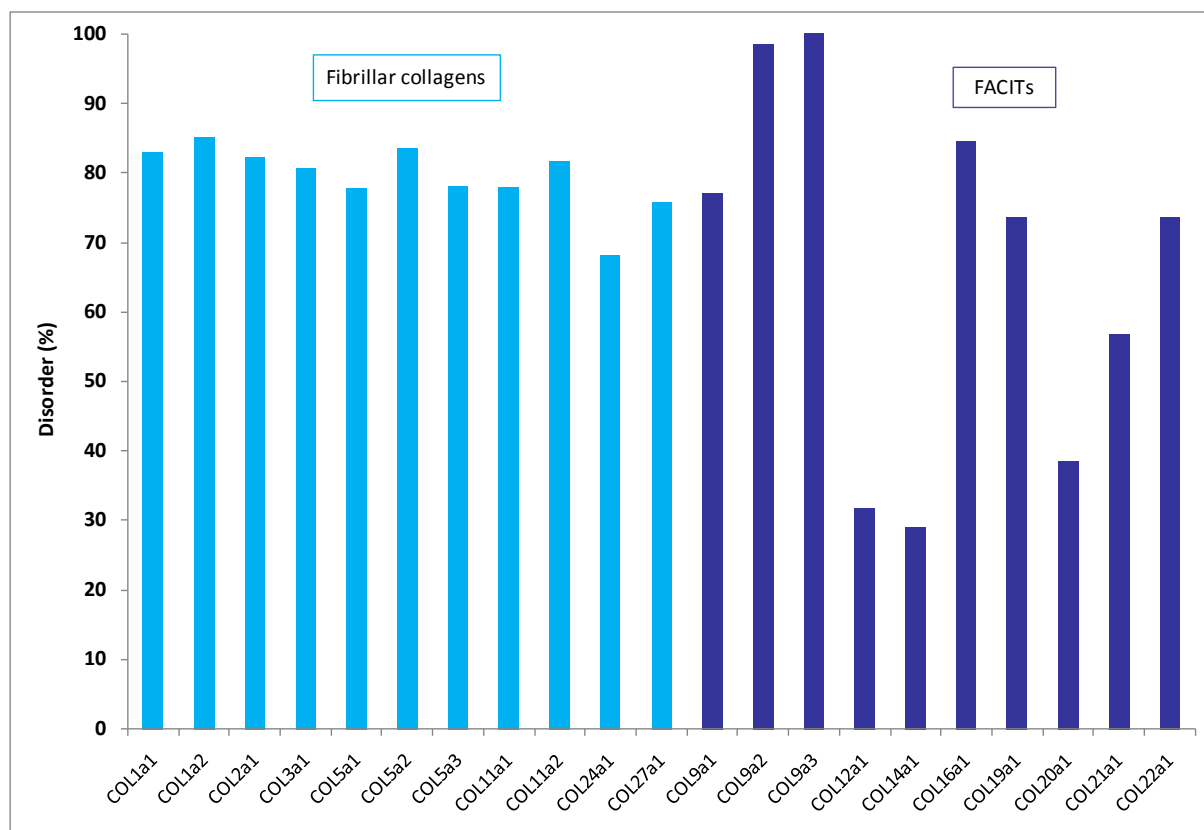

**Supplementary Figure 1S:** Amount of predicted disorder (%) in the  $\alpha$  chains of fibril-forming collagens and Fibril-Associated Collagens with Interrupted Triple-Helices (FACITs). The polypeptide chains are designed by the gene name.

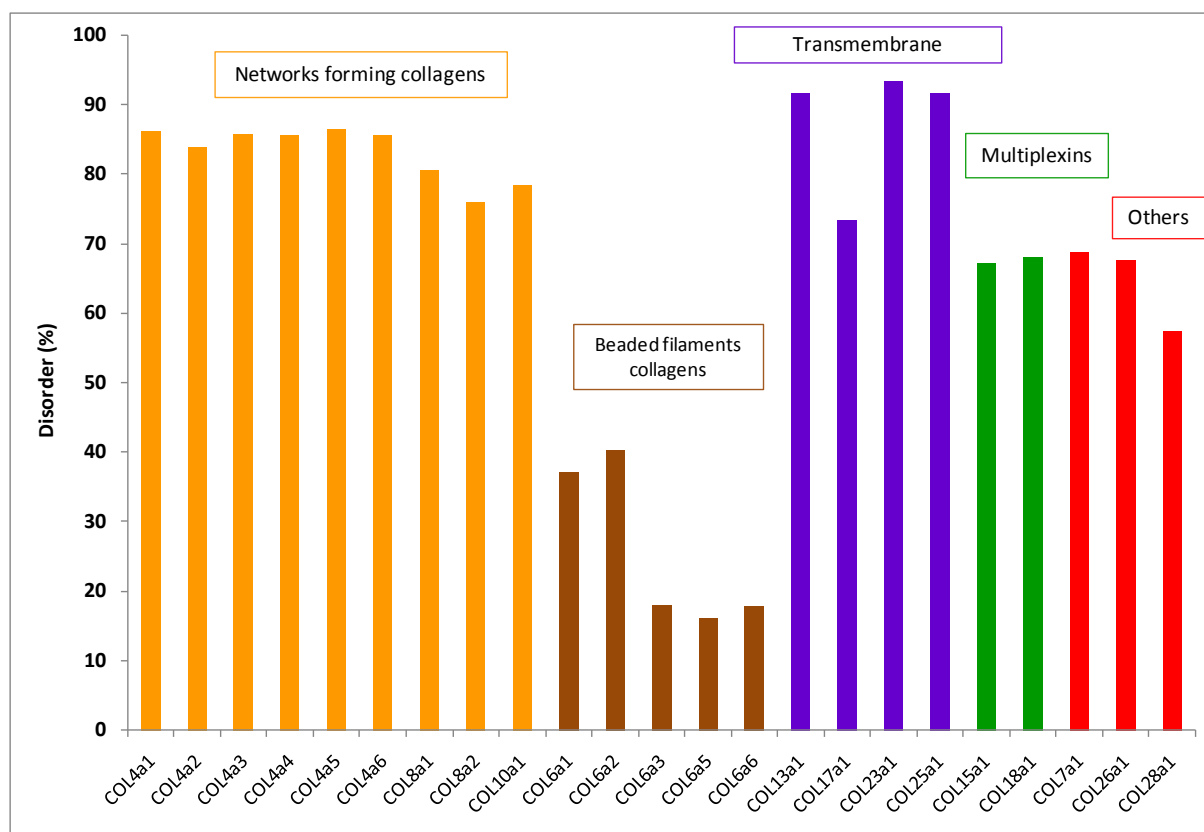

**Supplementary Figure 2S:** Amount of predicted disorder (%) in the  $\alpha$  chains of network-forming collagens, collagen forming beaded filaments, membrane collagens, multiplexins, and other collagens. The polypeptide chains are designed by the gene name.

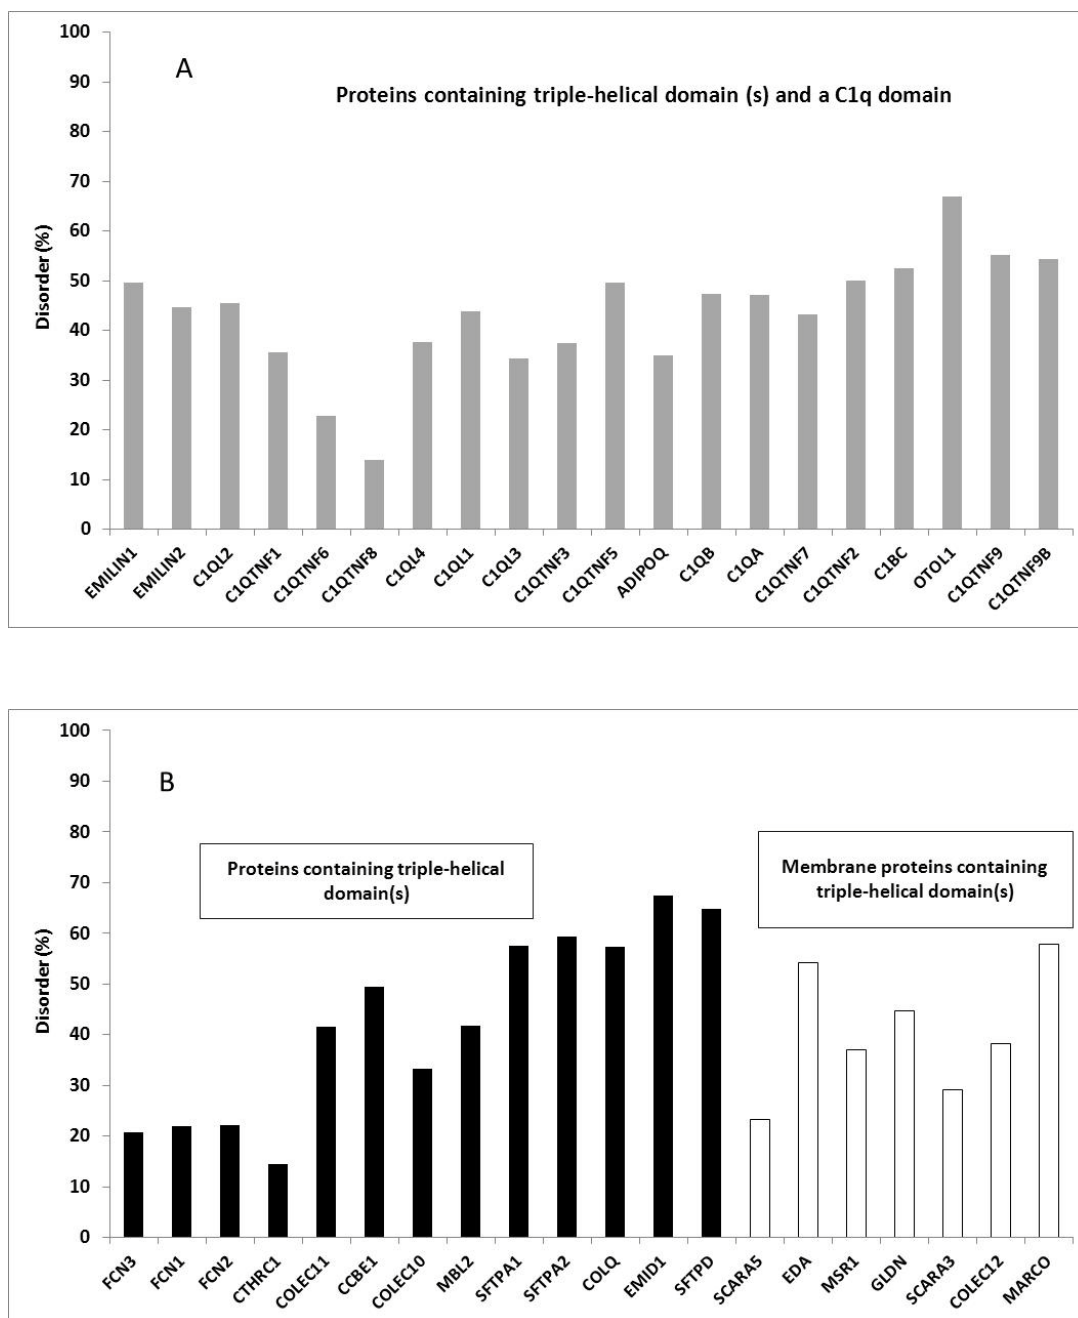

**Supplementary Figure 3S:** Amount of predicted disorder (%) in the individual chains of proteins containing triple-helical domain(s) and one C1q domain (A, ■), and in proteins that do not contain a C1q domain (B, □). The polypeptide chains are designed by the gene name and displayed in the increasing order of triple-helical content.

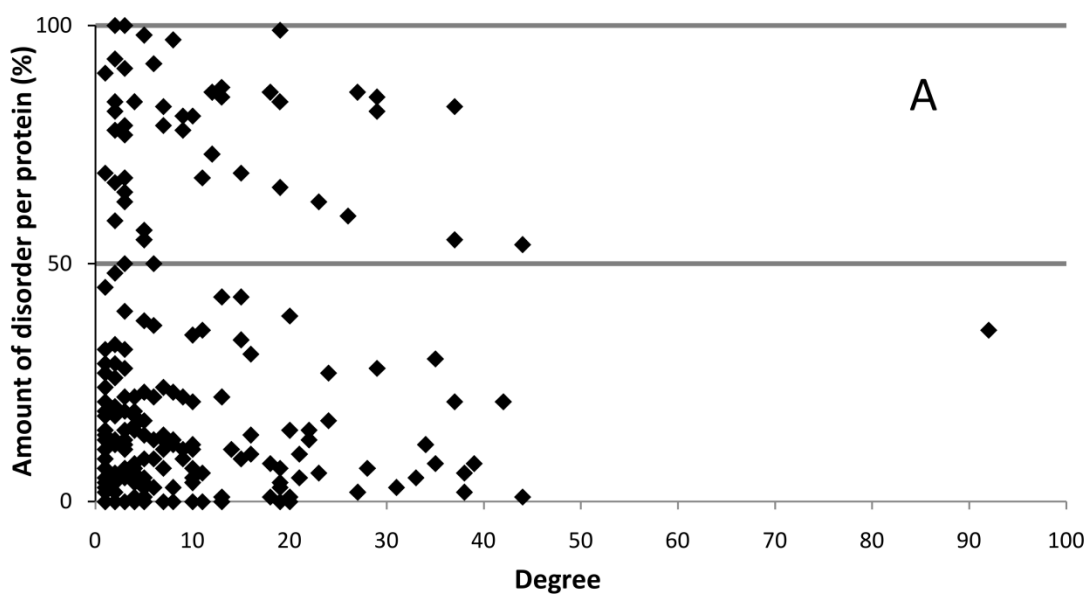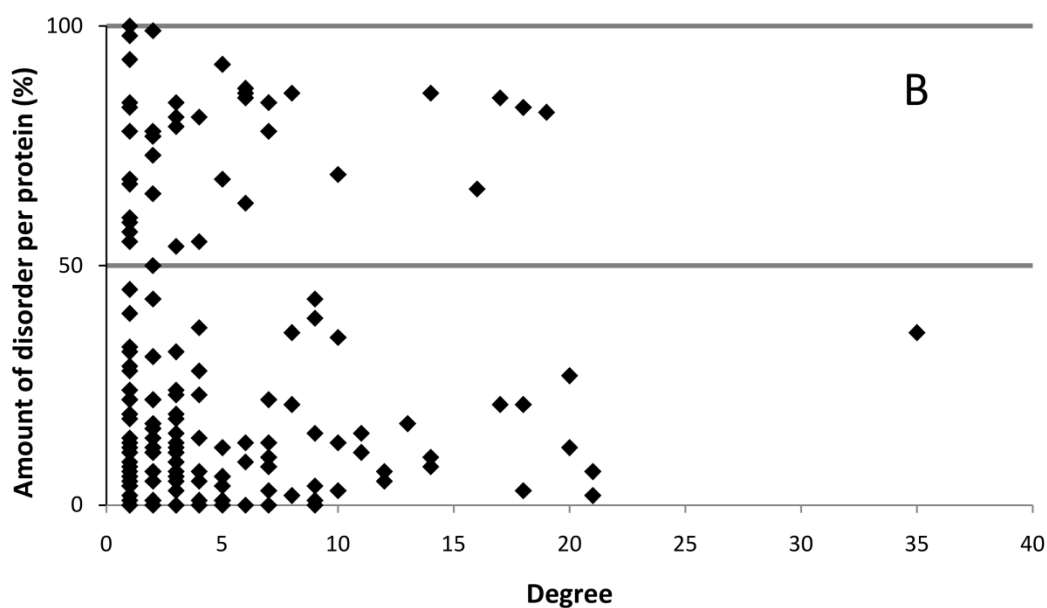

**Supplementary Figure 4S:** Amount of disorder (% of disordered residues) in extracellular proteins versus their degree in protein-protein interaction networks comprising all the protein partners of extracellular proteins (ECM\_1, A) or only the extracellular partners of extracellular proteins (ECM\_2, B).
