# Supplementary material for: Intrinsic disorder of the extracellular matrix
Source: Royal Society of Chemistry journal article supplement (doi:10.1039/c1mb05316g), 2011-10-19
Supplement: c1mb05316g_2.pdf [file c1mb05316g_2.pdf]

## INTRINSIC DISORDER OF THE EXTRACELLULAR MATRIX

Franck Peysselon<sup>1</sup>, Bin Xue<sup>2</sup>, Vladimir N. Uversky<sup>2,3\*</sup>, Sylvie Ricard-Blum<sup>1\*</sup>

### SUPPLEMENTARY TABLES

**Supplementary Table 1S:** Intrinsic disorder predicted in the protein domains found in the collagens. The signal peptide has been removed from the amino acid sequences before prediction. (C1q: C1q domain, C-propeptide: domain released during the maturation of procollagen, FNIII: fibronectin type III domain, Kunitz/BPTI: Kunitz/Bovine pancreatic trypsin inhibitor domain, N-propeptide: domain released during the maturation of procollagen, TSPN Thrombospondin N-terminal-like domains, VWFA: von Willebrand factor, type A, VWC: von Willebrand factor, type C). The analysis is based on UniProtKB sequence annotations. Intrinsic disorder has been predicted from protein sequences with IUPred1<sup>6,17</sup> as detailed in the Material and Methods section. The percentage of intrinsic disorder was calculated by counting all the disordered amino acids in the protein, dividing it by the number of all amino acids in the protein and multiplying it by 100.<sup>18</sup>

| Domain name     | Amount of predicted disorder (mean, %) | Range of disorder (%) | Number of domains in collagens |
|-----------------|----------------------------------------|-----------------------|--------------------------------|
| C1q             | 1.0                                    | 0.0 - 3.0             | 3                              |
| C-propeptide    | 21.0                                   | 10.5 - 37.1           | 9                              |
| Fibronectin III | 31.0                                   | 1.1 - 60.9            | 42                             |
| Kunitz/BPTI     | 9.8                                    | 0.0 - 27.4            | 3                              |
| Matricryptins   | 7.5                                    | 0.0 - 22.0            | 7                              |
| N-propeptide    | 67.6                                   | 56.1 - 100.0          | 6                              |
| VWFA            | 2.5                                    | 0.0 - 21.6            | 50                             |
| VWFC            | 13.8                                   | 6.78 - 23.8           | 4                              |
| TSPN            | 4.6                                    | 0.0 - 16.1            | 16                             |

**Supplementary Table 2S:** Intrinsic disorder predicted in collagen-like proteins containing a triple-helical domain but not referred to as collagens. The signal peptide has been removed from the sequence before prediction. (WD repeat-containing protein 33, Q9C0J8, a nuclear protein containing a triple-helical domain and neurogranin, Q92686, involved in signaling, were not included into the table because they are not secreted). Intrinsic disorder has been predicted from protein sequences with IUPred<sup>16,17</sup> as detailed in the Material and Methods section. The percentage of intrinsic disorder was calculated by counting all the disordered amino acids in the protein, dividing it by the number of all amino acids in the protein and multiplying it by 100.<sup>18</sup>

| Protein name                                           | UniProtKB AC | Number of disordered amino acids/Number of all amino acids | Amount of predicted disorder (%) | Domain Collagen-like (%) |
|--------------------------------------------------------|--------------|------------------------------------------------------------|----------------------------------|--------------------------|
| Acetylcholinesterase collagenic tail peptide           | Q9Y215       | 248/433                                                    | 57.3                             | 43.7                     |
| Adiponectin                                            | Q15848       | 79/226                                                     | 35.0                             | 29.2                     |
|                                                        |              |                                                            |                                  |                          |
| Complement C1q subcomponent subunit A                  | P02745       | 105/223                                                    | 47.1                             | 35.4                     |
| Complement C1q subcomponent subunit B                  | P02746       | 107/226                                                    | 47.4                             | 34.5                     |
| Complement C1q subcomponent subunit C                  | P02747       | 114/217                                                    | 52.5                             | 37.8                     |
| Complement C1q-like protein 2                          | Q7Z5L3       | 121/266                                                    | 45.5                             | 16.2                     |
| Complement C1q-like protein 3                          | Q5VWW1       | 81/235                                                     | 34.5                             | 21.7                     |
| Complement C1q-like protein 4                          | Q86Z23       | 84/223                                                     | 37.7                             | 19.7                     |
| C1q-related factor                                     | O75973       | 106/242                                                    | 43.8                             | 20.3                     |
| Complement C1q tumor necrosis factor-related protein 1 | Q9BXJ1       | 91/256                                                     | 35.6                             | 16.4                     |
| Complement C1q tumor necrosis factor-related protein 2 | Q9BXJ5       | 135/270                                                    | 50.0                             | 37.8                     |
| Complement C1q tumor necrosis factor-related protein 3 | Q9BXJ4       | 84/224                                                     | 37.5                             | 28.1                     |
| Complement C1q tumor necrosis factor-related protein 5 | Q9BXJ0       | 113/228                                                    | 49.6                             | 29.0                     |
| Complement C1q tumor necrosis factor-related protein 6 | Q9BXI9       | 53/232                                                     | 22.8                             | 18.1                     |
| Complement C1q tumor necrosis factor-related protein 7 | Q9BXJ2       | 118/273                                                    | 43.2                             | 37.4                     |

|                                                              |        |          |      |      |
|--------------------------------------------------------------|--------|----------|------|------|
| Complement C1q tumor necrosis factor-related protein 8       | P60827 | 33/235   | 14.0 | 18.3 |
| Complement C1q tumor necrosis factor-related protein 9A      | P0C862 | 173/314  | 55.1 | 49.7 |
| Complement C1q tumor necrosis factor-related protein 9B      | B2RNN3 | 171/314  | 54.5 | 49.7 |
| Collagen and calcium-binding EGF domain-containing protein 1 | Q6UXH8 | 184/372  | 49.5 | 21.5 |
| Otolin-1                                                     | A6NHN0 | 304/454  | 67.0 | 39.7 |
|                                                              |        |          |      |      |
| Mannose-binding protein C (collectin-1)                      | P11226 | 95/228   | 41.7 | 25.4 |
| Collectin-10                                                 | Q9Y6Z7 | 83/250   | 33.2 | 24.0 |
| Collectin-11                                                 | Q9BWP8 | 102/246  | 41.5 | 19.5 |
| Collectin-12                                                 | Q5KU26 | 283/742  | 38.1 | 19.8 |
|                                                              |        |          |      |      |
| Ficolin-1                                                    | O00602 | 65/297   | 21.9 | 13.1 |
| Ficolin-2                                                    | Q15485 | 64/288   | 22.2 | 14.6 |
| Ficolin-3                                                    | O75636 | 57/276   | 20.7 | 12.0 |
|                                                              |        |          |      |      |
| Ectodysplasin A                                              | Q92838 | 212/391  | 54.2 | 12.8 |
| Macrophage receptor with collagenous structure (MARCO)       | Q9UEW3 | 301/520  | 57.9 | 52.5 |
| Macrophage scavenger receptor types I and II                 | P21757 | 167/451  | 37.0 | 15.3 |
| Gliomedin                                                    | Q6ZMI3 | 246/551  | 44.7 | 15.6 |
| Scavenger receptor class A member 3                          | Q6AZY7 | 176/606  | 29.0 | 19.6 |
| Scavenger receptor class A member 5                          | Q6ZMJ2 | 115/495  | 23.2 | 12.1 |
|                                                              |        |          |      |      |
| Pulmonary surfactant A2                                      | Q8IWL1 | 135/228  | 59.2 | 32.0 |
| Pulmonary surfactant D                                       | P35247 | 230/355  | 64.8 | 49.9 |
| Pulmonary surfactant A1                                      | Q8IWL2 | 131/228  | 57.5 | 32.0 |
|                                                              |        |          |      |      |
| EMI domain Containing protein 1                              | Q96A84 | 282/419  | 67.3 | 45.4 |
| Emilin-1                                                     | Q9Y6C2 | 493/995  | 49.6 | 5.1  |
| Emilin-2                                                     | Q9BXX0 | 458/1023 | 44.8 | 5.2  |
| Collagen triple helix repeat-containing protein 1            | Q96CG8 | 31/213   | 14.6 | 16.0 |

**Supplementary Table 3S:** Intrinsic disorder of elastin and microfibrillar-associated proteins. The signal peptide has been removed from the sequence before prediction. Intrinsic disorder has been predicted from protein sequences with IUPred<sup>16,17</sup> as detailed in the Material and Methods section. The percentage of intrinsic disorder was calculated by counting all the disordered amino acids in the protein, dividing it by the number of all amino acids in the protein and multiplying it by 100.<sup>18</sup>

| Protein name                                                                | UniProtKB AC | Number of disordered amino acids/Number of all amino acids | Amount of predicted disorder (%) |
|-----------------------------------------------------------------------------|--------------|------------------------------------------------------------|----------------------------------|
| Elastin                                                                     | P15502       | 39/760                                                     | 5.1                              |
| Fibrillin-1                                                                 | P35555       | 76/2844                                                    | 2.7                              |
| Fibrillin-2                                                                 | P35556       | 93/2884                                                    | 3.2                              |
| Fibrillin-3                                                                 | Q75N90       | 51/2778                                                    | 1.8                              |
| EMILIN-1                                                                    | Q9Y6C2       | 493/995                                                    | 49.6                             |
| EMILIN-2                                                                    | Q9BXX0       | 458/1023                                                   | 44.8                             |
| EMILIN-3                                                                    | Q9NT22       | 207/744                                                    | 27.8                             |
| Multimerin-1                                                                | Q13201       | 226/1209                                                   | 18.7                             |
| Multimerin2                                                                 | Q9H8L6       | 230/927                                                    | 24.8                             |
| EMI domain Containing protein 1 (Emu-1)                                     | Q96A84       | 282/419                                                    | 67.3                             |
| Microfibrillar-associated protein 1                                         | P55081       | 305/439                                                    | 69.5                             |
| Microfibrillar-associated protein 2 (Microfibril-associated glycoprotein 1) | p55001       | 71/166                                                     | 42.8                             |
| Microfibril-associated glycoprotein 3                                       | P55082       | 81/344                                                     | 23.6                             |
| Microfibrillar-associated protein 3-like                                    | O75121       | 148/381                                                    | 38.9                             |
| Microfibril-associated glycoprotein 4                                       | P55083       | 0/234                                                      | 0.0                              |
| Microfibrillar-associated protein 5 (Microfibril-associated glycoprotein 2) | Q13361       | 27/152                                                     | 17.8                             |
| Fibulin-1                                                                   | P23142       | 10/674                                                     | 1.5                              |
| Fibulin-2                                                                   | P98095       | 318/1157                                                   | 27.5                             |
| Fibulin-3                                                                   | Q12805       | 53/476                                                     | 11.1                             |
| Fibulin-4                                                                   | O95967       | 34/418                                                     | 8.1                              |
| Fibulin-5                                                                   | Q9UBX5       | 1/425                                                      | 0.2                              |
| Fibulin-6                                                                   | Q96RW7       | 295/5614                                                   | 5.3                              |

|                              |        |         |      |
|------------------------------|--------|---------|------|
| Fibulin-7                    | Q53RD9 | 14/415  | 3.4  |
| Lysyl oxidase (LOX)          | P28300 | 153/396 | 38.6 |
| Lysyl oxidase-like 1 (LOXL1) | Q08397 | 305/549 | 55.6 |
| Lysyl oxidase-like 2 (LOXL2) | Q9Y4K0 | 5/749   | 0.7  |
| Lysyl oxidase-like (LOXL3)   | P58215 | 50/728  | 6.9  |
| Lysyl oxidase-like (LOXL4)   | Q96JB6 | 35/732  | 4.8  |

**Supplementary Table 4S:** Intrinsic disorder of the protein core of proteoglycans. The signal peptide has been removed from the sequence before prediction. Intrinsic disorder has been predicted from protein sequences with IUPred<sup>16,17</sup> as detailed in the Material and Methods section. The percentage of intrinsic disorder was calculated by counting all the disordered amino acids in the protein, dividing it by the number of all amino acids in the protein and multiplying it by 100.<sup>18</sup>

| Protein name                                               | UniProtKB AC | Number of disordered amino acids /Number of all amino acids | Amount of predicted disorder (%) |
|------------------------------------------------------------|--------------|-------------------------------------------------------------|----------------------------------|
| <b>Proteoglycans Hyalactans</b>                            |              |                                                             |                                  |
| Aggrecan                                                   | P16112       | 1574/2399                                                   | 65.6                             |
| Brevican                                                   | Q96GW7       | 307/889                                                     | 34.5                             |
| Neurocan                                                   | O14594       | 718/1299                                                    | 55.3                             |
| Versican                                                   | P13611       | 2121/3376                                                   | 62.8                             |
| <b>Small Leucine Rich Proteoglycans</b>                    |              |                                                             |                                  |
| Biglycan (class I)                                         | P21810       | 12/349                                                      | 3.4                              |
| Decorin (class I)                                          | P07585       | 23/343                                                      | 6.7                              |
| Asporin (class I)                                          | Q9BXN1       | 28/366                                                      | 7.7                              |
| Extracellular matrix protein 2 (class I)                   | O94769       | 215/679                                                     | 31.7                             |
| Fibromodulin (class II)                                    | Q06828       | 20/358                                                      | 5.6                              |
| Keratocan (class II)                                       | O60938       | 4/332                                                       | 1.2                              |
| Lumican (class II)                                         | P51884       | 0/320                                                       | 0.0                              |
| Prolargin (PRELP) (class II)                               | P51888       | 47/362                                                      | 13.0                             |
| Osteomodulin (osteoadherin) (class II)                     | Q99983       | 53/401                                                      | 13.2                             |
| Epiphycan (class III)                                      | Q99645       | 75/303                                                      | 24.8                             |
| Opticin (class III)*                                       | Q9UBM4       | 76/313                                                      | 24.3                             |
| Mimecan (osteoglycin) (class III)                          | P20774       | 20/278                                                      | 7.2                              |
| Chondroadherin (class IV)                                  | O15335       | 6/337                                                       | 1.8                              |
| Chondroadherin-like protein                                | Q6NUI6       | 77/732                                                      | 10.5                             |
| Nyctalopin (class IV)                                      | Q9GZU5       | 23/458                                                      | 5.0                              |
| Tsukushi (class IV)                                        | Q8WUA8       | 18/337                                                      | 5.3                              |
| Podocan (class V)                                          | Q7Z5L7       | 84/594                                                      | 14.1                             |
| Podocan-like protein-1 (class V)                           | Q6PEZ8       | 5/486                                                       | 1.0                              |
| Matrix-remodeling-associated protein 5 (Adlican, Adhesion) | Q9NR99       | 1163/2802                                                   | 41.5                             |

|                                                                                   |        |           |      |
|-----------------------------------------------------------------------------------|--------|-----------|------|
| protein with leucine-rich repeats and immunoglobulin domains related to perlecan) |        |           |      |
|                                                                                   |        |           |      |
| <b>Basement membrane proteoglycans</b>                                            |        |           |      |
| Agrin                                                                             | O00468 | 308/2016  | 15.3 |
| Bamacan                                                                           | Q9UQE7 | 368/1217  | 30.2 |
| Perlecan                                                                          | P98160 | 934/4370  | 21.4 |
| Leprecan-1                                                                        | Q32P28 | 94/714    | 13.2 |
| Leprecan like-1                                                                   | Q8IVL5 | 78/684    | 11.4 |
| Leprecan like-2                                                                   | Q8IVL6 | 198/716   | 27.7 |
| Leprecan like-4                                                                   | Q92791 | 65/437    | 14.9 |
|                                                                                   |        |           |      |
| <b>GPI-anchored proteoglycans</b>                                                 |        |           |      |
| Glypican-1                                                                        | P35052 | 120/535   | 22.4 |
| Glypican-2                                                                        | Q8N158 | 161/556   | 29.0 |
| Glypican-3                                                                        | P51654 | 41/556    | 7.4  |
| Glypican-4                                                                        | O75487 | 67/538    | 12.5 |
| Glypican-5                                                                        | P78333 | 64/548    | 11.7 |
| Glypican-6                                                                        | Q9Y625 | 103/532   | 19.4 |
|                                                                                   |        |           |      |
| <b>Membrane proteoglycans</b>                                                     |        |           |      |
| Syndecan-1                                                                        | P18827 | 247/288   | 85.8 |
| Syndecan-2                                                                        | P34741 | 113/183   | 61.8 |
| Syndecan-3                                                                        | O75056 | 352/442   | 79.6 |
| Syndecan-4                                                                        | P31431 | 99/180    | 55.0 |
| Neuropilin-1                                                                      | O14786 | 92/902    | 10.2 |
| Neuropilin-2                                                                      | O60462 | 108/911   | 11.9 |
| Neuroglycan                                                                       | O95196 | 341/536   | 63.6 |
| Betaglycan                                                                        | Q03167 | 164/831   | 19.7 |
| NG2                                                                               | Q6UVK1 | 422/2293  | 18.4 |
| CD44                                                                              | P16070 | 497/722   | 68.8 |
| Interphotoreceptor matrix proteoglycan2SPACRCAN                                   | Q17R60 | 218/777   | 28.1 |
|                                                                                   |        |           |      |
| Endocan                                                                           | Q3V4E3 | 23/115    | 20.0 |
| Serglycin                                                                         | P10124 | 62/131    | 47.3 |
| Lubricin (proteoglycan 4)                                                         | Q92954 | 1021/1380 | 74.0 |
| Testican-1                                                                        | Q08629 | 62/418    | 14.8 |
| Testican-2                                                                        | Q92563 | 76/402    | 18.9 |
| Testican-3                                                                        | Q9BQ16 | 55/415    | 13.3 |

**Supplementary Table 5S:** Intrinsic disorder predicted in laminin human chains. The signal peptide has been removed from the sequence before prediction. Intrinsic disorder has been predicted from protein sequences with IUPred<sup>16,17</sup> as detailed in the Material and Methods section. The percentage of intrinsic disorder was calculated by counting all the disordered amino acids in the protein, dividing it by the number of all amino acids in the protein and multiplying it by 100.<sup>18</sup>

| Laminin chains         | UniProtKB AC     | Number of disordered amino acids /Number of all amino acids |                  | Amount of predicted disorder (%) |                  |
|------------------------|------------------|-------------------------------------------------------------|------------------|----------------------------------|------------------|
| $\alpha$ 1             | P25391           | 109/3058                                                    |                  | 3.6                              |                  |
| $\alpha$ 2             | P24043           | 286/3100                                                    |                  | 9.2                              |                  |
| $\alpha$ 3             | Q16787           | 358/3298                                                    |                  | 10.9                             |                  |
| $\alpha$ 4             | Q16363           | 257/1799                                                    |                  | 14.3                             |                  |
| $\alpha$ 5             | O15230           | 336/3660                                                    |                  | 9.2                              |                  |
| $\beta$ 1              | P07942           | 244/1765                                                    |                  | 13.8                             |                  |
| $\beta$ 2              | P55268           | 266/1766                                                    |                  | 15.1                             |                  |
| $\beta$ 3              | Q13751           | 150/1155                                                    |                  | 13.0                             |                  |
| $\beta$ 4              | A4D0S4           | 80/1742                                                     |                  | 4.6                              |                  |
| $\gamma$ 1             | P11047           | 385/1576                                                    |                  | 24.4                             |                  |
| $\gamma$ 2             | Q13753           | 261/1172                                                    |                  | 22.3                             |                  |
| $\gamma$ 3             | Q9Y6N6           | 230/1556                                                    |                  | 14.8                             |                  |
| Predicted disorder (%) |                  |                                                             |                  |                                  |                  |
| Laminin chains         | Laminin G-like 1 | Laminin G-like 2                                            | Laminin G-like 3 | Laminin G-like 4                 | Laminin G-like 5 |
| $\alpha$ 1             | 11.1             | 7.3                                                         | 0.0              | 0.0                              | 5.5              |
| $\alpha$ 2             | 3.3              | 0.0                                                         | 12.4             | 0.6                              | 13.4             |
| $\alpha$ 3             | 13.4             | 12.3                                                        | 0.0              | 1.2                              | 10.9             |
| $\alpha$ 4             | 0.0              | 0.0                                                         | 3.6              | 1.7                              | 2.3              |
| $\alpha$ 5             | 10.3             | 0.0                                                         | 15.4             | 25.2                             | 0.0              |
| Mean                   | 7.7              | 3.9                                                         | 6.3              | 5.7                              | 6.4              |



**Supplementary Table 6S:** Intrinsic disorder of matricellular proteins. The signal peptide has been removed from the sequence before prediction. Intrinsic disorder has been predicted from protein sequences with IUPred<sup>16,17</sup> as detailed in the Material and Methods section. The percentage of intrinsic disorder was calculated by counting all the disordered amino acids in the protein, dividing it by the number of all amino acids in the protein and multiplying it by 100.<sup>18</sup>

| Protein name                           | UniProtKB AC | Number of disordered amino acids /Number of all amino acids | Amount of predicted disorder (%) |
|----------------------------------------|--------------|-------------------------------------------------------------|----------------------------------|
| CCN1                                   | O00622       | 3/357                                                       | 0.8                              |
| CCN2                                   | P29279       | 0/323                                                       | 0.0                              |
| CCN3                                   | P48745       | 4/326                                                       | 1.2                              |
| CCN4                                   | O95388       | 16/345                                                      | 4.6                              |
| CCN5                                   | O76076       | 13/227                                                      | 5.7                              |
| CCN6                                   | O95389       | 13/331                                                      | 3.9                              |
| Osteopontin                            | P10451       | 294/298                                                     | 98.7                             |
| Sparc                                  | P09486       | 50/286                                                      | 17.5                             |
| Smoc1                                  | Q9H4F8       | 128/408                                                     | 31.4                             |
| Smoc2                                  | Q9H3U7       | 181/425                                                     | 42.6                             |
| Hevin                                  | Q14515       | 410/648                                                     | 63.3                             |
| Tenascin C                             | P24821       | 281/2179                                                    | 12.8                             |
| Tenascin X                             | P22105       | 2025/4266                                                   | 47.5                             |
| Tsp1                                   | P07996       | 237/1152                                                    | 20.6                             |
| Tsp2                                   | P35442       | 218/1154                                                    | 18.9                             |
| Tsp3                                   | P49746       | 222/934                                                     | 23.8                             |
| Tsp4                                   | P35443       | 196/935                                                     | 21.0                             |
| Tsp5                                   | P49747       | 238/737                                                     | 32.3                             |
| Galectin 1                             | P09382       | 0/135                                                       | 0.0                              |
| Galectin 2                             | P05162       | 16/132                                                      | 12.1                             |
| Galectin 3                             | P17931       | 106/250                                                     | 42.4                             |
| Galectin 4                             | P56470       | 34/323                                                      | 10.5                             |
| Galectin 7                             | P47929       | 27/136                                                      | 19.9                             |
| Galectin 8                             | O00214       | 6/317                                                       | 1.9                              |
| Galectin 9                             | O00182       | 31/355                                                      | 8.7                              |
| Galectin 10                            | Q05315       | 0/142                                                       | 0.0                              |
| Galectin 12                            | Q96DT0       | 5/336                                                       | 1.5                              |
| Galectin 13                            | Q9UHV8       | 0/139                                                       | 0.0                              |
| Galectin 14                            | Q8TCE9       | 0/139                                                       | 0.0                              |
| Plasminogen Activator Inhibitor type 1 | P05121       | 0/379                                                       | 0.0                              |
| Autotaxin                              | Q13822       | 36/836                                                      | 4.3                              |
| Periostin                              | Q15063       | 49/815                                                      | 6.0                              |

**Supplementary Table 7S:** Intrinsic disorder of Small Integrin Binding N-Linked Glycoproteins (SIBLINGs). The signal peptide has been removed from the sequence before prediction. Intrinsic disorder has been predicted from protein sequences with IUPred<sup>16,17</sup> as detailed in the Material and Methods section. The percentage of intrinsic disorder was calculated by counting all the disordered amino acids in the protein, dividing it by the number of all amino acids in the protein and multiplying it by 100.<sup>18</sup>

| Protein name                             | UniProtKB AC | Number of disordered amino acids /Number of all amino acids | Amount of predicted disorder (%) |
|------------------------------------------|--------------|-------------------------------------------------------------|----------------------------------|
| Bone sialoprotein                        | P21815       | 274/301                                                     | 91.0                             |
| Dentin matrix protein 1                  | Q13316       | 497/497                                                     | 100.0                            |
| Dentin sialophosphoprotein               | Q9NZW4       | 1285/1286                                                   | 99.9                             |
| Matrix extracellular phosphoglycoprotein | Q9NQ76       | 492/508                                                     | 96.9                             |
| Osteopontin                              | P10451       | 294/298                                                     | 98.7                             |

**Supplementary Table 8S:** Intrinsic disorder of matrix metalloproteinases (MMPs). The signal peptide has been removed from the sequence before prediction. Intrinsic disorder has been predicted from protein sequences with IUPred<sup>16,17</sup> as detailed in the Material and Methods section. The percentage of intrinsic disorder was calculated by counting all the disordered amino acids in the protein, dividing it by the number of all amino acids in the protein and multiplying it by 100.<sup>18</sup>

| Protein name              | UniProtKB AC | Number of disordered amino acids /Number of all amino acids | Amount of predicted disorder (%) |
|---------------------------|--------------|-------------------------------------------------------------|----------------------------------|
| <b>Collagenases</b>       |              |                                                             |                                  |
| MMP1                      | P03956       | 66/450                                                      | 14.7                             |
| MMP8                      | P22894       | 62/447                                                      | 13.9                             |
| MMP13                     | P45452       | 39/452                                                      | 8.6                              |
| <b>Gelatinases</b>        |              |                                                             |                                  |
| MMP2                      | P08253       | 13/631                                                      | 2.1                              |
| MMP9                      | P14780       | 84/688                                                      | 12.2                             |
| <b>Stromelysins</b>       |              |                                                             |                                  |
| MMP3                      | P08254       | 48/460                                                      | 10.4                             |
| MMP10                     | P09238       | 30/459                                                      | 6.5                              |
| <b>Matrilysins</b>        |              |                                                             |                                  |
| MMP7                      | P09237       | 25/250                                                      | 10.0                             |
| MMP26                     | Q9NRE1       | 13/244                                                      | 5.3                              |
| MMP11                     | P24347       | 83/476                                                      | 17.4                             |
| <b>Membrane-type MMPs</b> |              |                                                             |                                  |
| <b>Transmembrane type</b> |              |                                                             |                                  |
| MMP14                     | P50281       | 72/562                                                      | 12.8                             |
| MMP15                     | P51511       | 137/628                                                     | 21.8                             |
| MMP16                     | P51512       | 94/576                                                      | 16.3                             |
| MMP24                     | Q9Y5R2       | 86/593                                                      | 14.5                             |
| <b>GPI-anchored</b>       |              |                                                             |                                  |
| MMP17                     | Q9ULZ9       | 124/568                                                     | 21.8                             |
| MMP25                     | Q9NPA2       | 178/541                                                     | 32.9                             |
| <b>Others</b>             |              |                                                             |                                  |
| MMP12                     | P39900       | 18/454                                                      | 4.0                              |
| MMP19                     | Q99542       | 71/490                                                      | 14.5                             |
| MMP20                     | O60882       | 17/461                                                      | 3.7                              |
| MMP21                     | Q8N119       | 124/545                                                     | 22.8                             |
| MMP23                     | O75900       | 19/390                                                      | 4.9                              |
| MMP27                     | Q9H306       | 18/496                                                      | 3.6                              |
| MMP28                     | Q9H239       | 22/498                                                      | 4.4                              |

**Supplementary Table 9S:** Human proteins annotated with the UniProtKB keyword “extracellular matrix”, predicted to contain more than 50% of global disorder and included in the analysis using DAVID bioinformatics resource.<sup>14,15</sup>

| UniProtKB AC | DAVID gene identifier | DAVID Gene Name                                  |
|--------------|-----------------------|--------------------------------------------------|
| P16112       | 802704                | aggrecan                                         |
| Q9NP70       | 797689                | ameloblastin (enamel matrix protein)             |
| Q99217       | 804457                | amelogenin (amelogenesis imperfecta 1, X-linked) |
| Q99218       | 810092                | amelogenin, Y-linked                             |
| P27797       | 788614                | calreticulin                                     |
| Q6UXA7       | 772442                | chromosome 6 open reading frame 15 (protein STG) |
| P02452       | 808600                | collagen, type I, alpha 1                        |
| P08123       | 781103                | collagen, type I, alpha 2                        |
| P02458       | 787944                | collagen, type II, alpha 1                       |
| P02461       | 795569                | collagen, type III, alpha 1                      |
| P02462       | 800275                | collagen, type IV, alpha 1                       |
| P08572       | 804645                | collagen, type IV, alpha 2                       |
| Q01955       | 824817                | collagen, type IV, alpha 3 (Goodpasture antigen) |
| P53420       | 819591                | collagen, type IV, alpha 4                       |
| P29400       | 784210                | collagen, type IV, alpha 5                       |
| Q14031       | 812933                | collagen, type IV, alpha 6                       |
| P20849       | 826638                | collagen, type IX, alpha 1                       |
| Q14055       | 788090                | collagen, type IX, alpha 2                       |
| Q14050       | 780333                | collagen, type IX, alpha 3                       |
| P20908       | 780010                | collagen, type V, alpha 1                        |
| P05997       | 814924                | collagen, type V, alpha 2                        |
| P25940       | 810626                | collagen, type V, alpha 3                        |
| Q02388       | 774727                | collagen, type VII, alpha 1                      |
| P27658       | 787706                | collagen, type VIII, alpha 1                     |
| P25067       | 772627                | collagen, type VIII, alpha 2                     |
| Q03692       | 803916                | collagen, type X, alpha 1                        |
| P12107       | 777404                | collagen, type XI, alpha 1                       |
| P13942       | 803177                | collagen, type XI, alpha 2                       |
| Q14993       | 774673                | collagen, type XIX, alpha 1                      |
| P39059       | 826696                | collagen, type XV, alpha 1                       |
| Q07092       | 823173                | collagen, type XVI, alpha 1                      |
| Q9UMD9       | 789642                | collagen, type XVII, alpha 1                     |
| P39060       | 777598                | collagen, type XVIII, alpha 1                    |
| Q96P44       | 783035                | collagen, type XXI, alpha 1                      |
| Q8NFW1       | 776338                | collagen, type XXII, alpha 1                     |
| Q17RW2       | 782335                | collagen, type XXIV, alpha 1                     |
| Q8IZC6       | 792574                | collagen, type XXVII, alpha 1                    |

|        |        |                                                                   |
|--------|--------|-------------------------------------------------------------------|
| Q2UY09 | 791505 | collagen, type XXVIII, alpha 1                                    |
| Q13316 | 772614 | dentin matrix acidic phosphoprotein 1                             |
| Q9NZW4 | 773812 | dentin sialophosphoprotein                                        |
| Q96A84 | 793960 | EMI domain containing 1                                           |
| Q96A83 | 774209 | EMI domain containing 2 (collagen, type XXVI, alpha 1)            |
| Q9NRM1 | 817683 | enamelin                                                          |
| O00515 | 814366 | ladinin 1                                                         |
| Q9NQ76 | 810893 | matrix extracellular phosphoglycoprotein                          |
| P55081 | 783592 | microfibrillar-associated protein 1                               |
| Q6XPR3 | 778770 | repetin                                                           |
| Q14515 | 792300 | SPARC-like 1 (hevin)                                              |
| Q8IWL2 | 781929 | surfactant protein A1B; surfactant protein A1                     |
| Q8IWL1 | 808468 | surfactant protein A2; surfactant protein A2B                     |
| P35247 | 783108 | surfactant protein D                                              |
| Q8WVF2 | 781416 | upper zone of growth plate and cartilage matrix associated (UCMA) |
| P13611 | 800485 | versican                                                          |
